# Supplementary material for: Prevalence of somatic-mental multimorbidity and its prospective association with disability among older adults in China
Source: publisher site journal article supplement (doi:10.18632/aging.103070), 2020-04-25
Supplement: Supplementary file [file aging-v12i8-103070-supplementary-material-SD1.pdf]

**SUPPLEMENTARY FIGURE**

| No. Mental conditions (MC) | No. Somatic conditions/diseases (SC) |      |          |
|----------------------------|--------------------------------------|------|----------|
|                            | 0                                    | 1    | 2+       |
| 0                          | No                                   | 1 SC | SC Mult. |
| 1                          | 1 MC                                 |      |          |
| 2                          | MC Mult.                             |      | SMM      |

**Supplementary Figure 1. Model showing the grouping of somatic and mental conditions/diseases.** Participants were grouped by the number of somatic conditions (SC) and mental conditions (MC). Mult., multimorbidity; Ref., reference group; SMM, somatic-mental multimorbidity.
